# Supplementary material
Source: Springer Nature journal article supplement (https://www.springermedizin.de/resource/supplementary/13075_2012_3804_MOESM4_ESM.pdf/9695404)

Mean  $\pm$  SEM, n=7-8 discs

Normalized T2-values

**(a) NP**

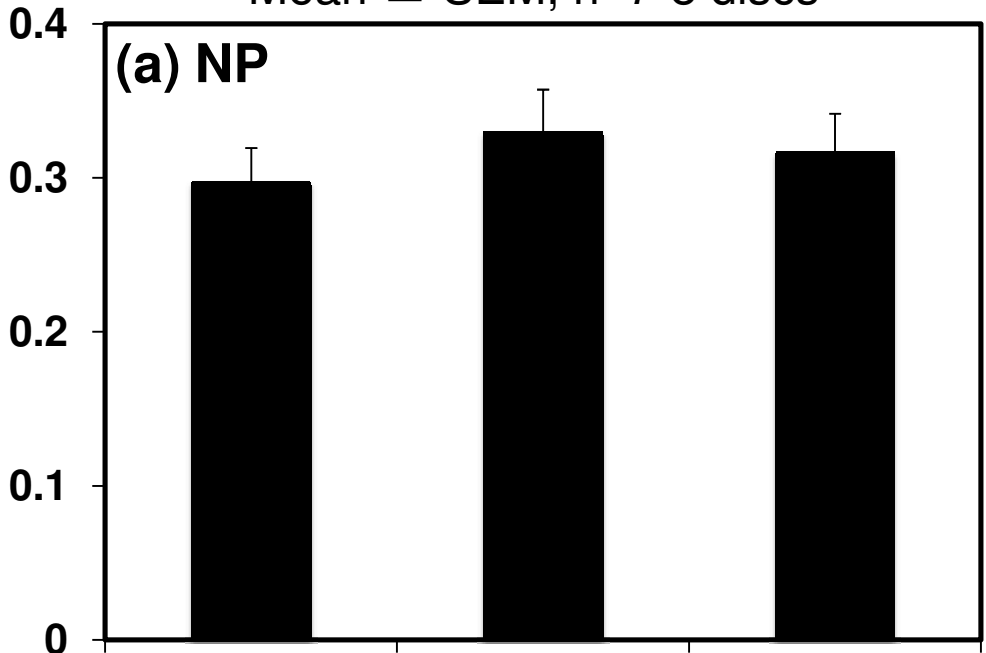

**(b) AF**

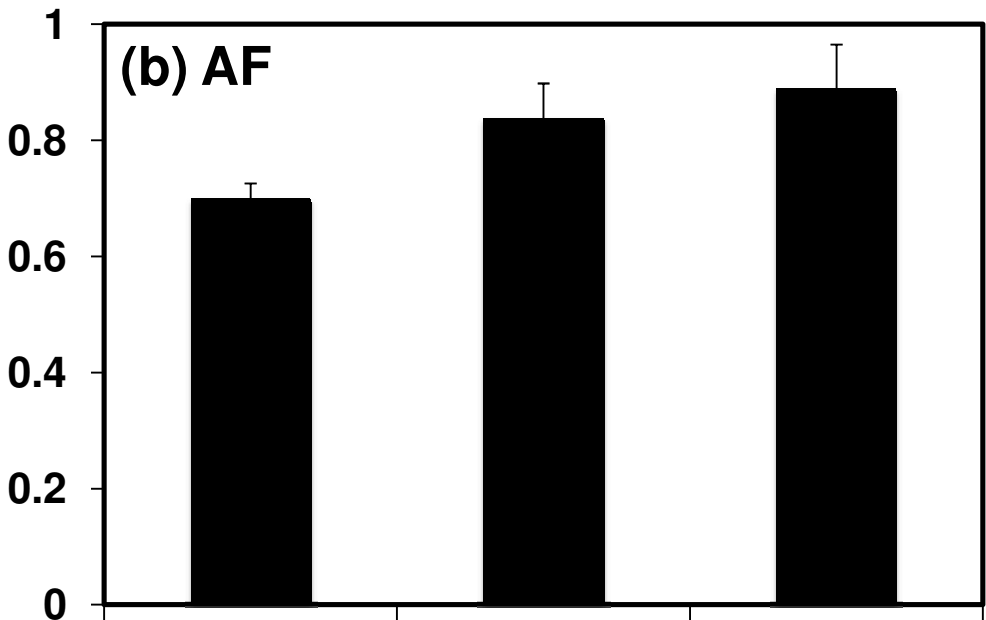

**PBS**

**PPP**

**PRP**

Supplement: MOESM4 [file 9695404]
